# Supplementary material for: Phototherapeutic applications of benzophenone-containing NIR-emitting photosensitizers based on different receptor modulations
Source: Royal Society of Chemistry journal article supplement (doi:10.1039/d4tb01473a), 2024-01-01
Supplement: d4tb01473a1.pdf [file d4tb01473a1.pdf]

## Supporting Information

### **Phototherapeutic applications of benzophenone-containing NIR-emitting photosensitizers based on different receptor modulations**

Shuge Chen,<sup>a,b</sup> Jianqing Li,<sup>c</sup> Weidong Yin,<sup>b</sup> Weiqiang Li,<sup>b</sup> Xitong He,<sup>b</sup> Hui Liang,<sup>b</sup> Zarfar Mahmood,<sup>b</sup> Yanping Huo,<sup>b</sup> Zujin Zhao,<sup>\*c</sup> and Shaomin Ji<sup>\*a,b</sup>

Guangdong Provincial Laboratory of Chemistry and Fine Chemical Engineering Jieyang Center,  
Jieyang, P. R. China.  
E-mail: smji@gdut.edu.cn

## 1. Synthesis

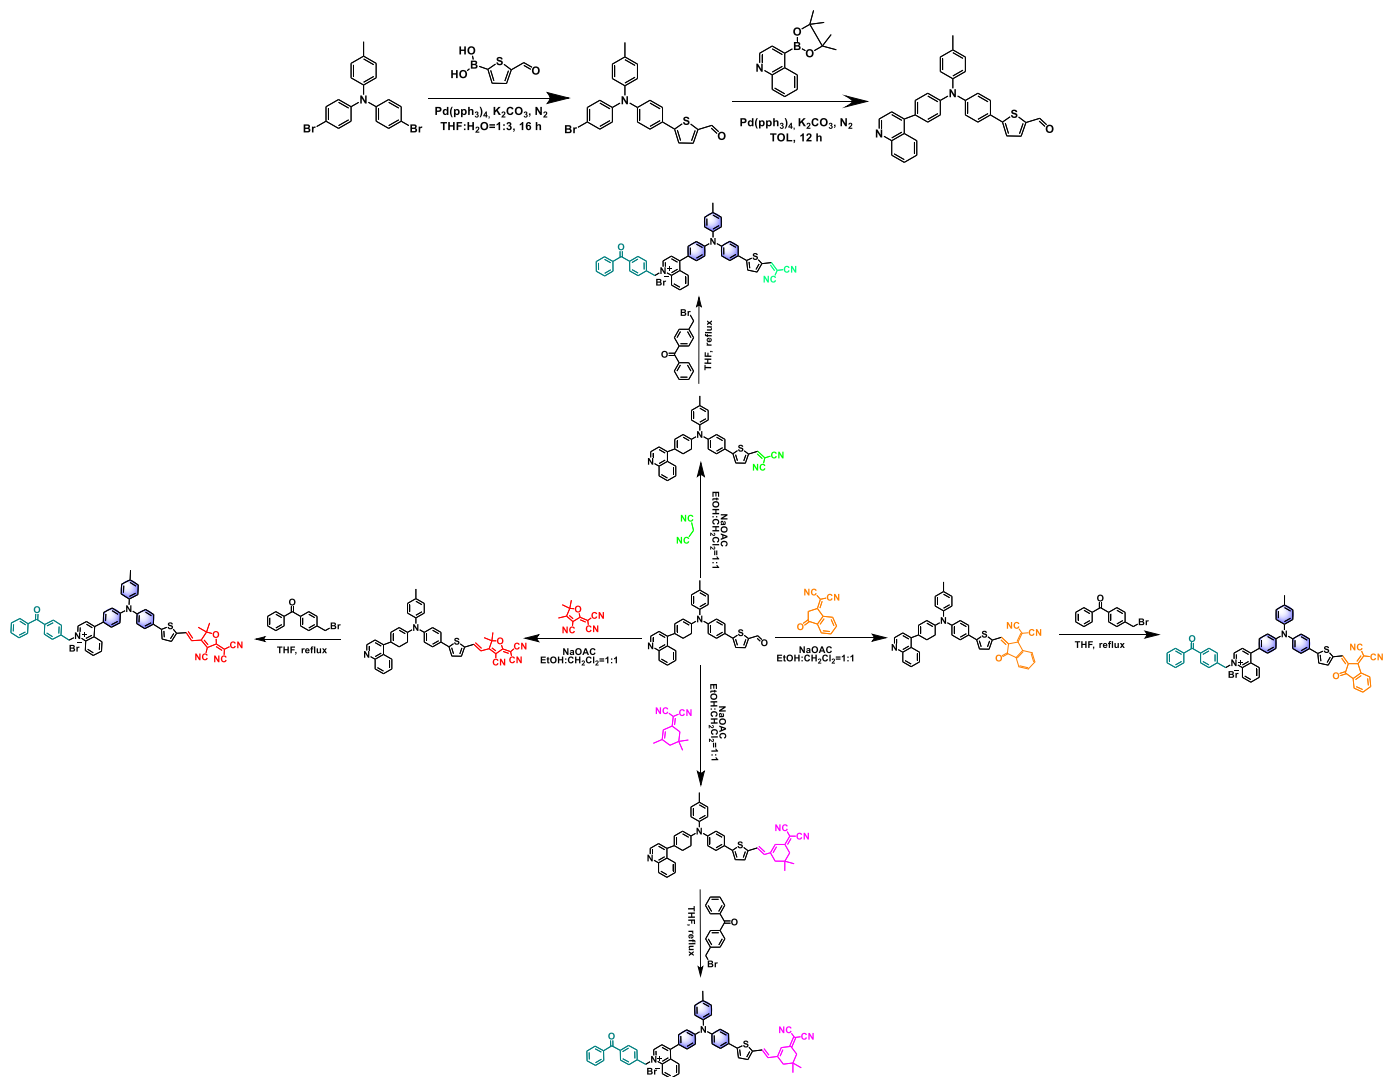

Scheme S1. Synthetic routes of CN-TPAQ-BP, ICN-TPAQ-BP, FCN-TPAQ-BP and ACN-TPAQ-BP.

## 1. $^1\text{H}$ and $^{13}\text{C}$ NMR spectra

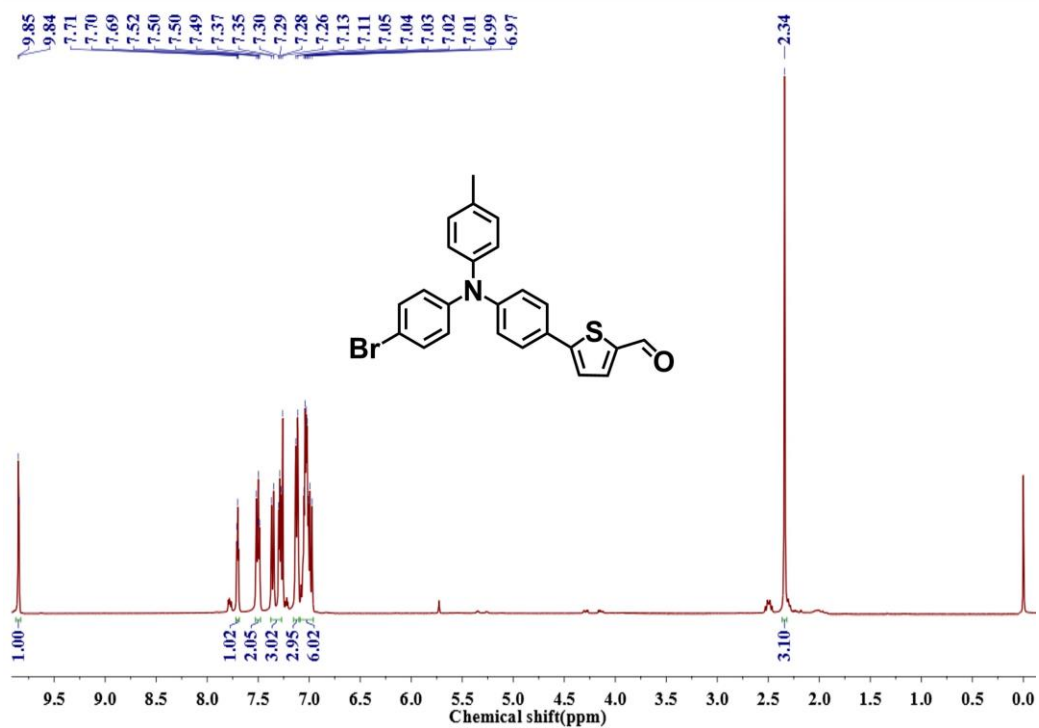

Fig. S1 <sup>1</sup>H NMR spectrum of TPA-T in CDCl<sub>3</sub>.

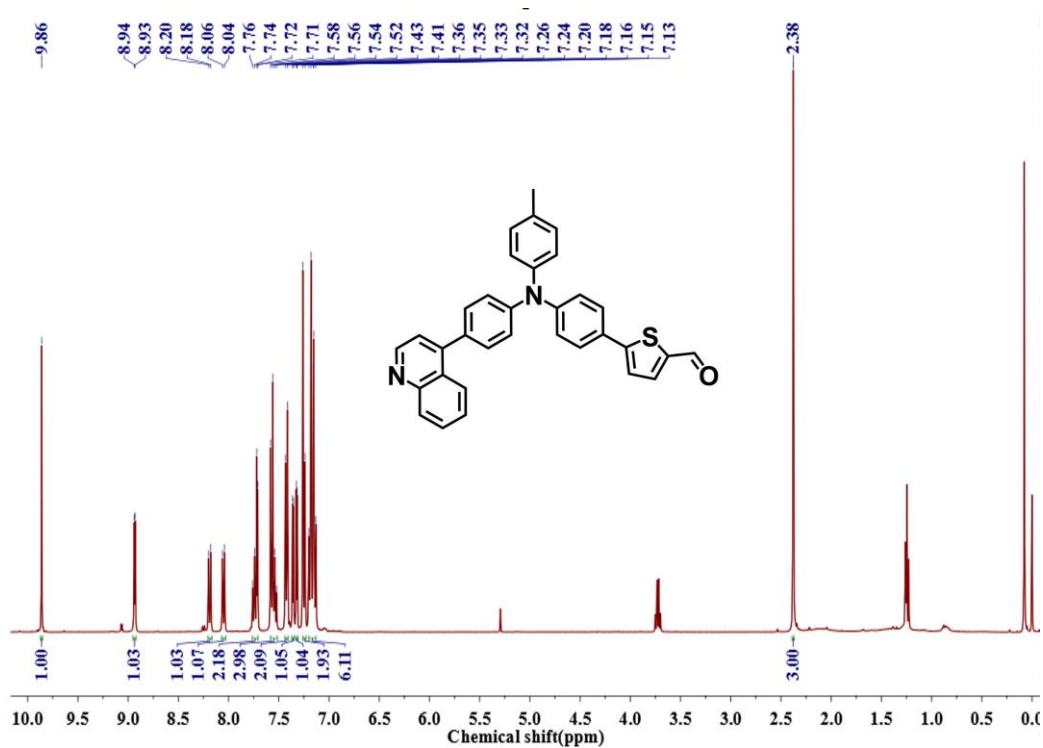

Fig. S2 <sup>1</sup>H NMR spectrum of TPAQ-T in CDCl<sub>3</sub>.

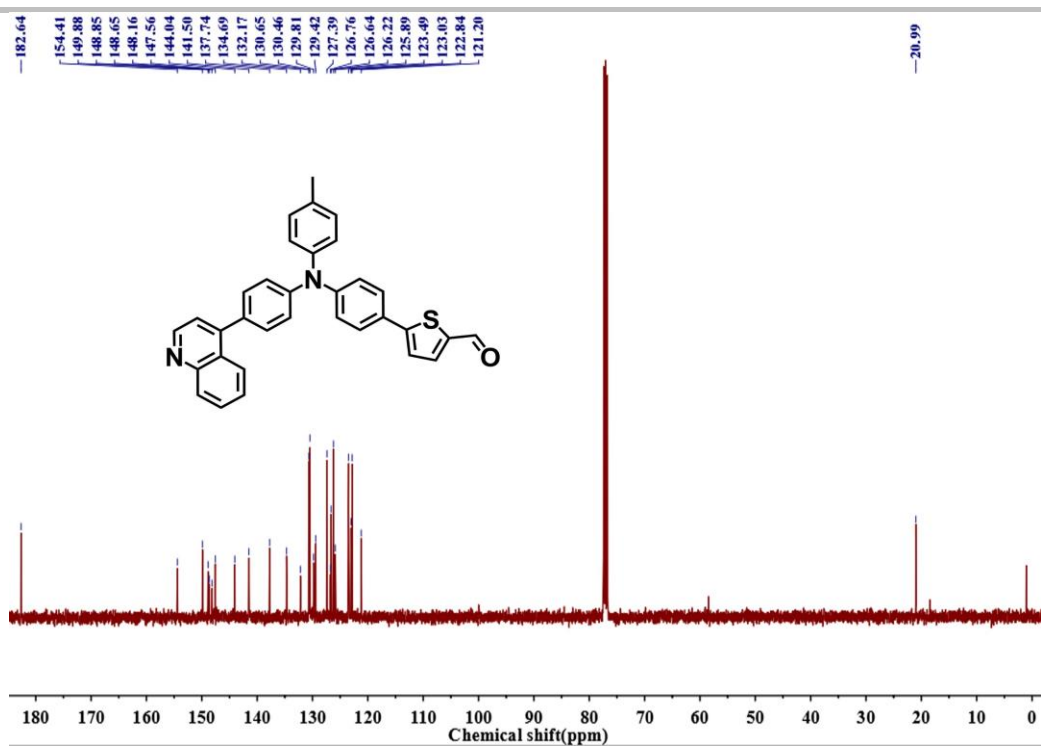

Fig. S3 <sup>13</sup>C NMR spectrum of TPAQ-T in CDCl<sub>3</sub>.

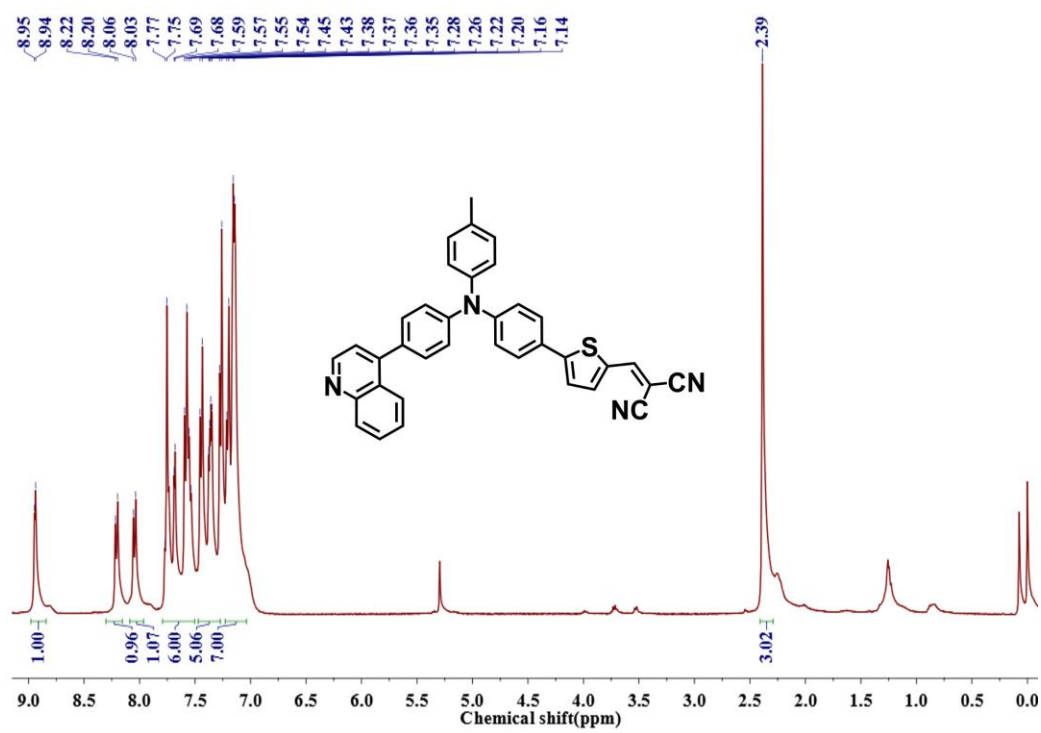

Fig. S4 <sup>1</sup>H NMR spectrum of CN-TPAQ in CDCl<sub>3</sub>.

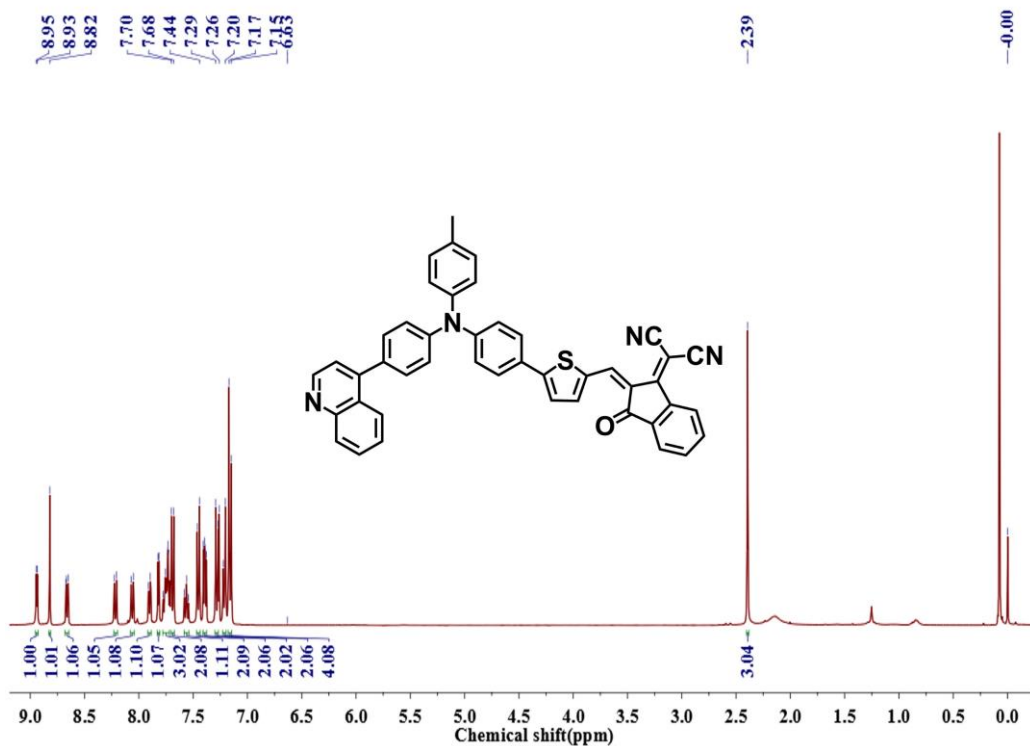

Fig. S5  $^1\text{H}$  NMR spectrum of ICN-TPAQ in  $\text{CDCl}_3$ .

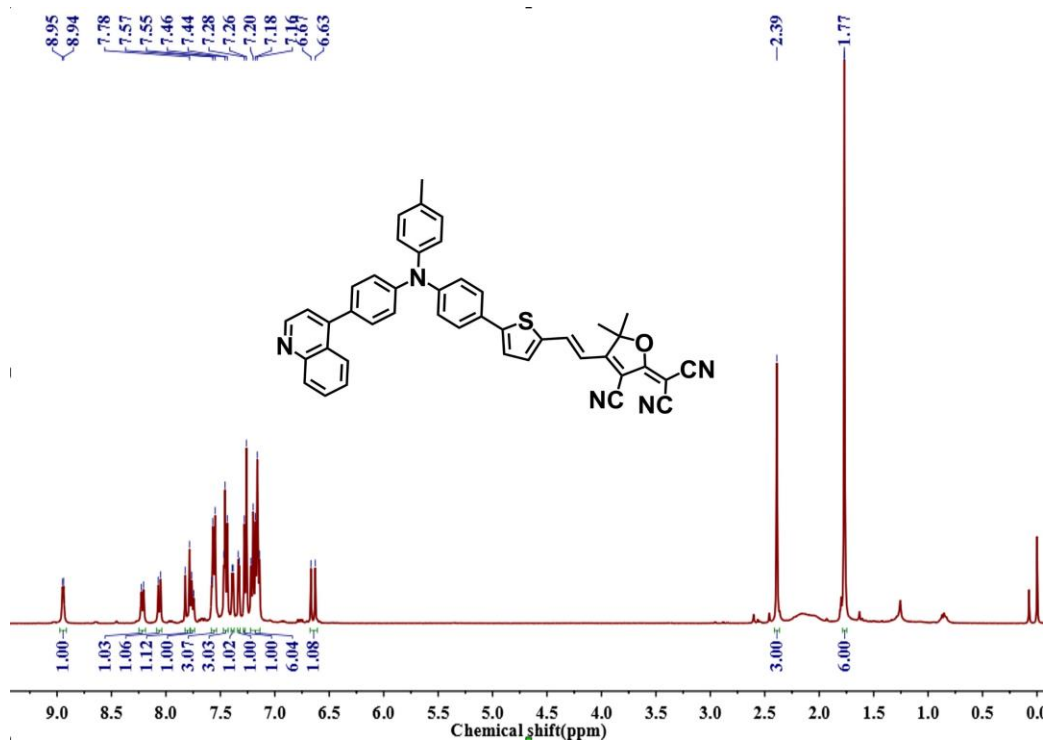

Fig. S6  $^1\text{H}$  NMR spectrum of FCN-TPAQ in  $\text{CDCl}_3$ .

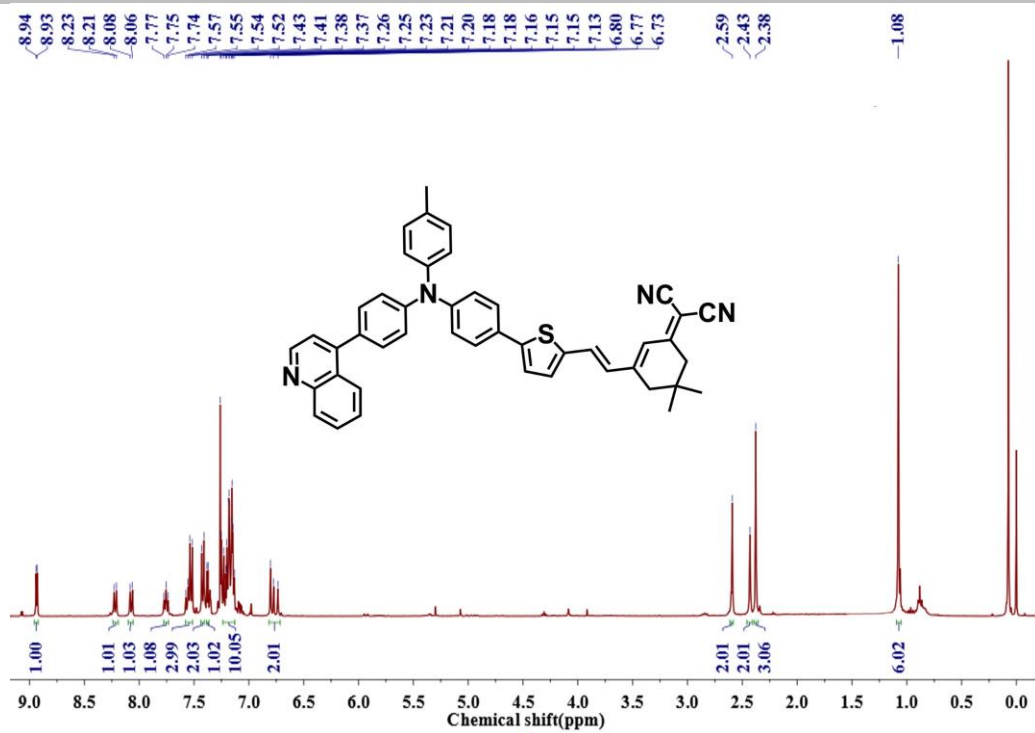

Fig. S7 <sup>1</sup>H NMR spectrum of ACN-TPAQ in CDCl<sub>3</sub>.

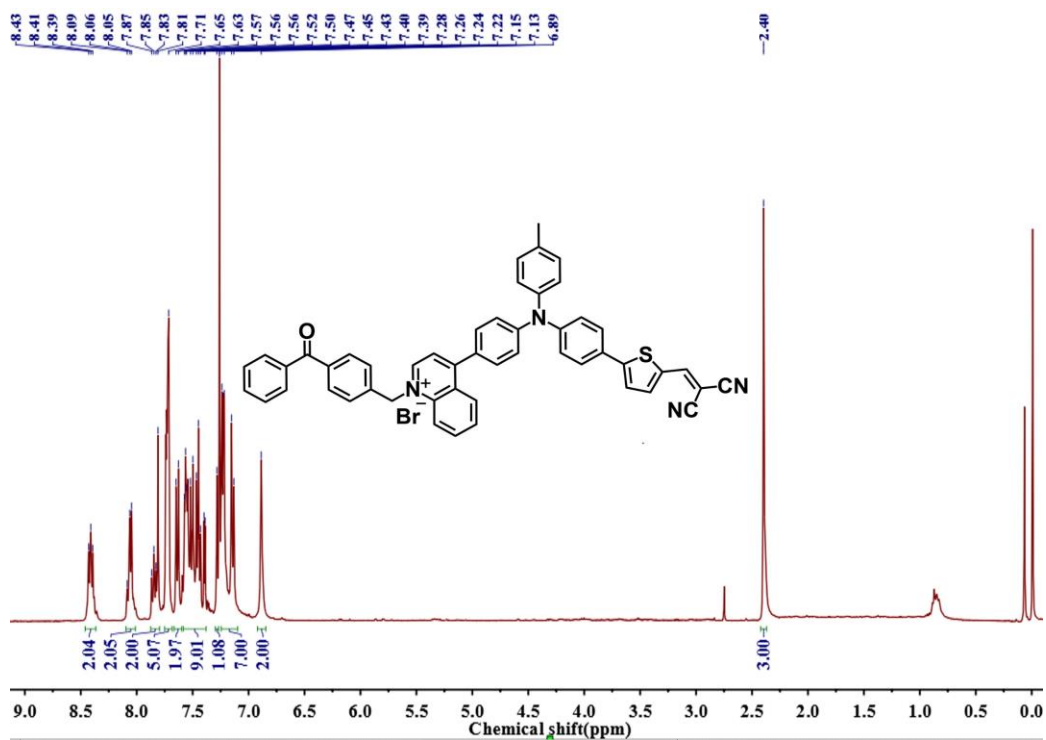

Fig. S8 <sup>1</sup>H NMR spectrum of CN-TPAQ-BP in CDCl<sub>3</sub>.

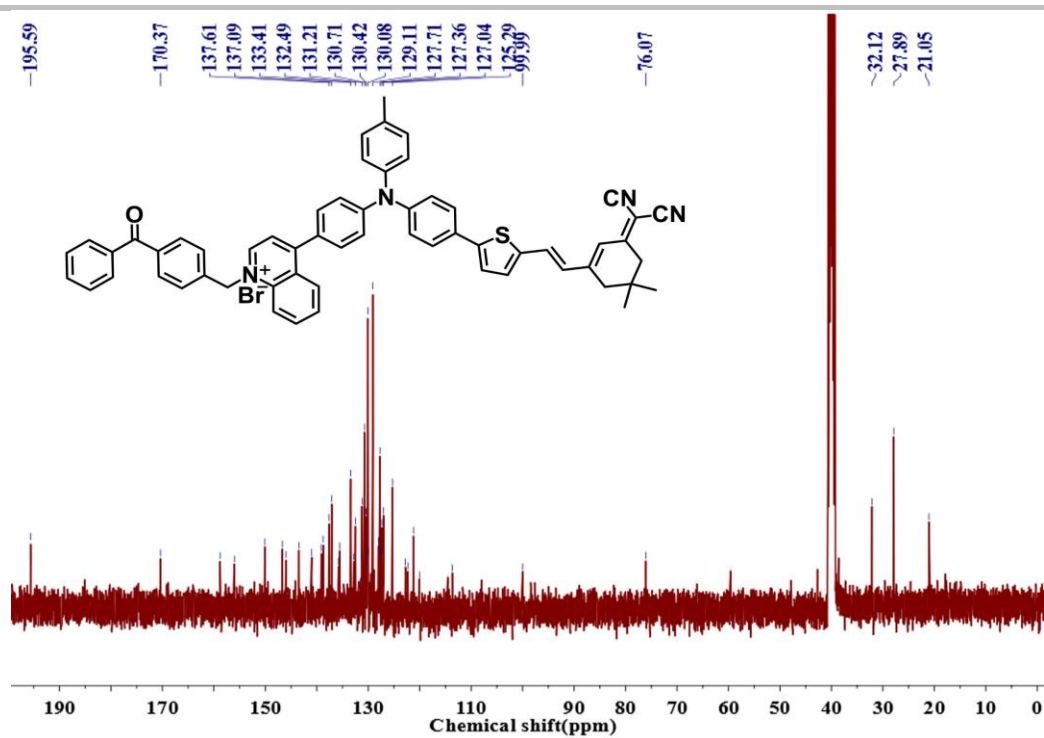

Fig. S9  $^{13}\text{C}$  NMR spectrum of CN-TPAQ-BP in  $\text{CDCl}_3$ .

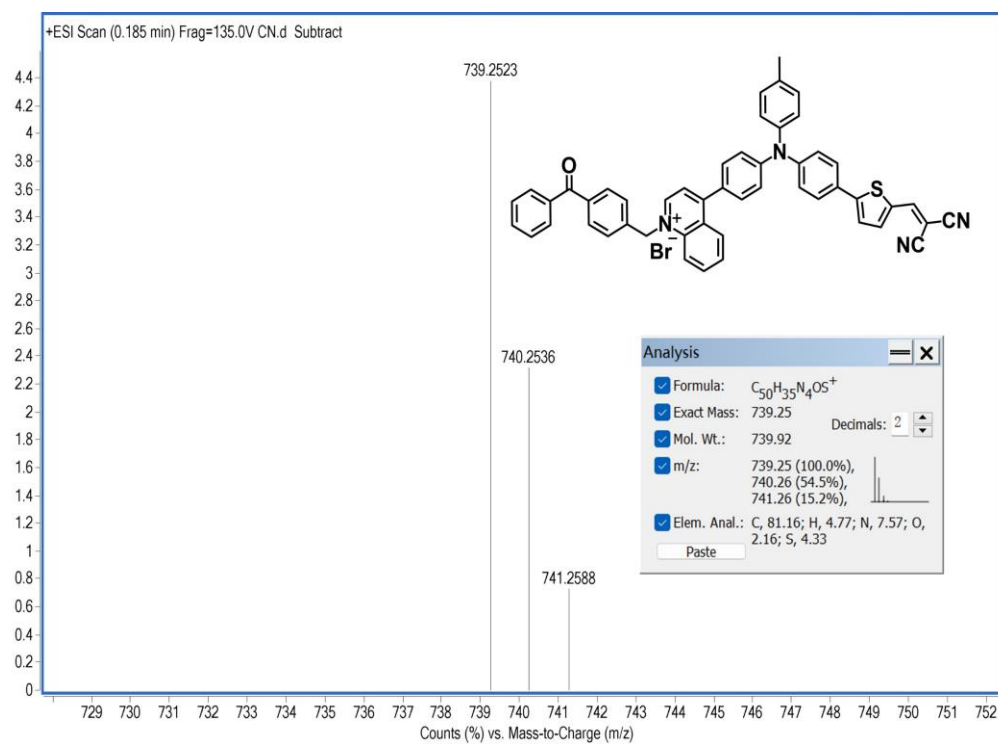

Fig. S10 ESI-MS spectrum of CN-TPAQ-BP.

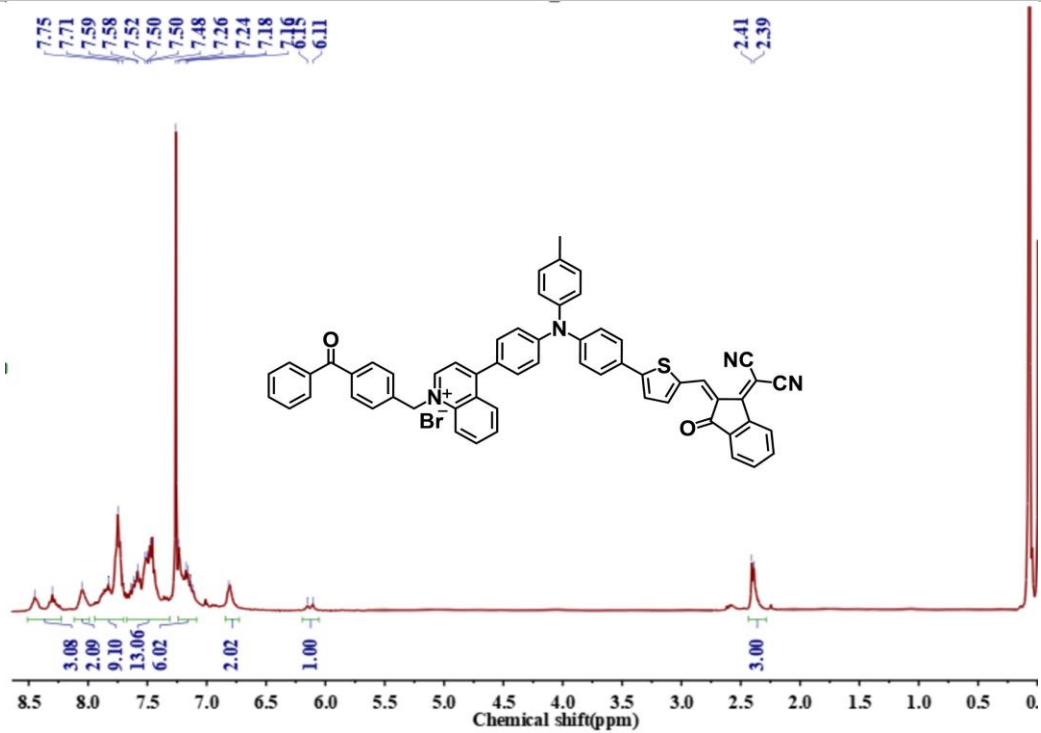

Fig. S11 <sup>1</sup>H NMR spectrum of ICN-TPAQ-BP in CDCl<sub>3</sub>

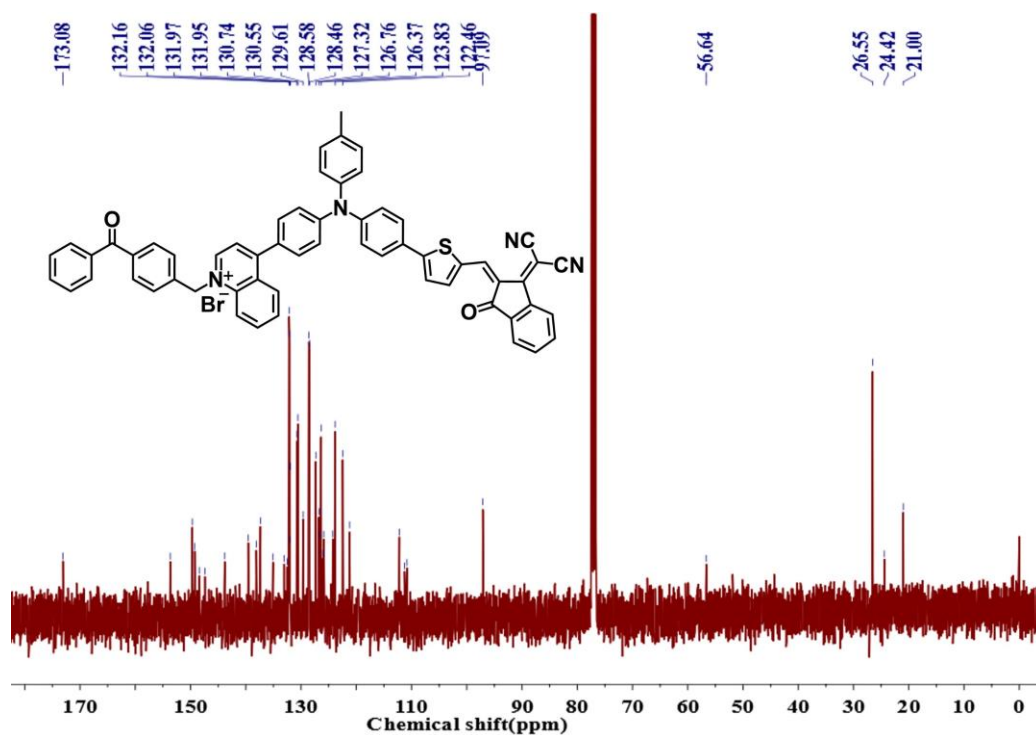

Fig. S12 <sup>13</sup>C NMR spectrum of ICN-TPAQ-BP in CDCl<sub>3</sub>.



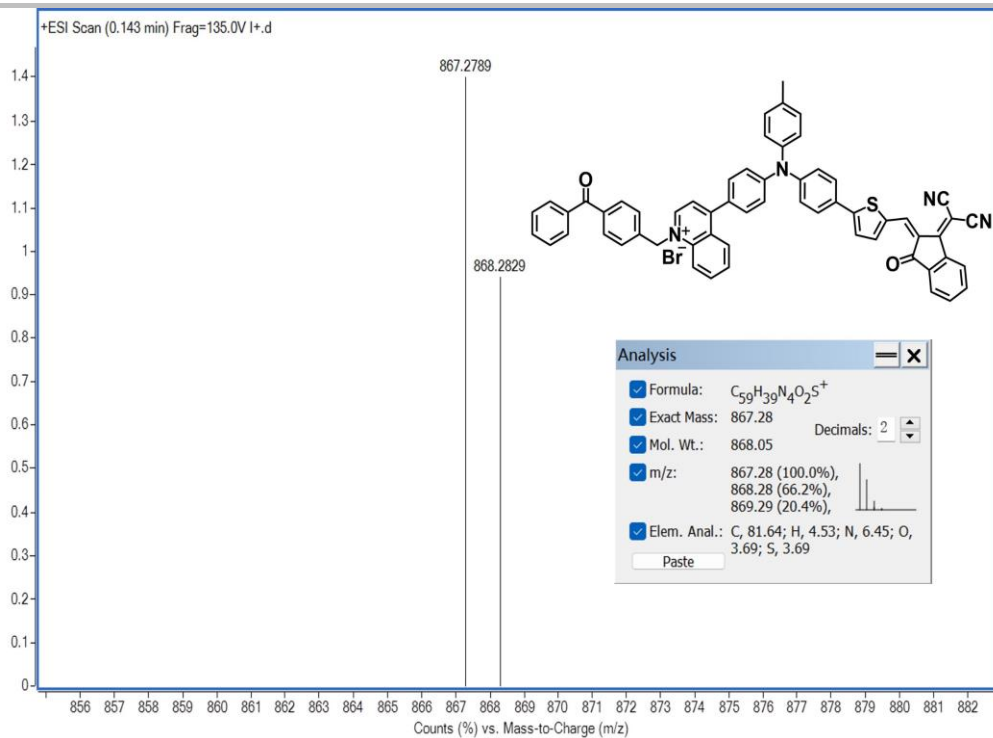

Fig. S13 ESI-MS spectrum of ICN-TPAQ-BP.

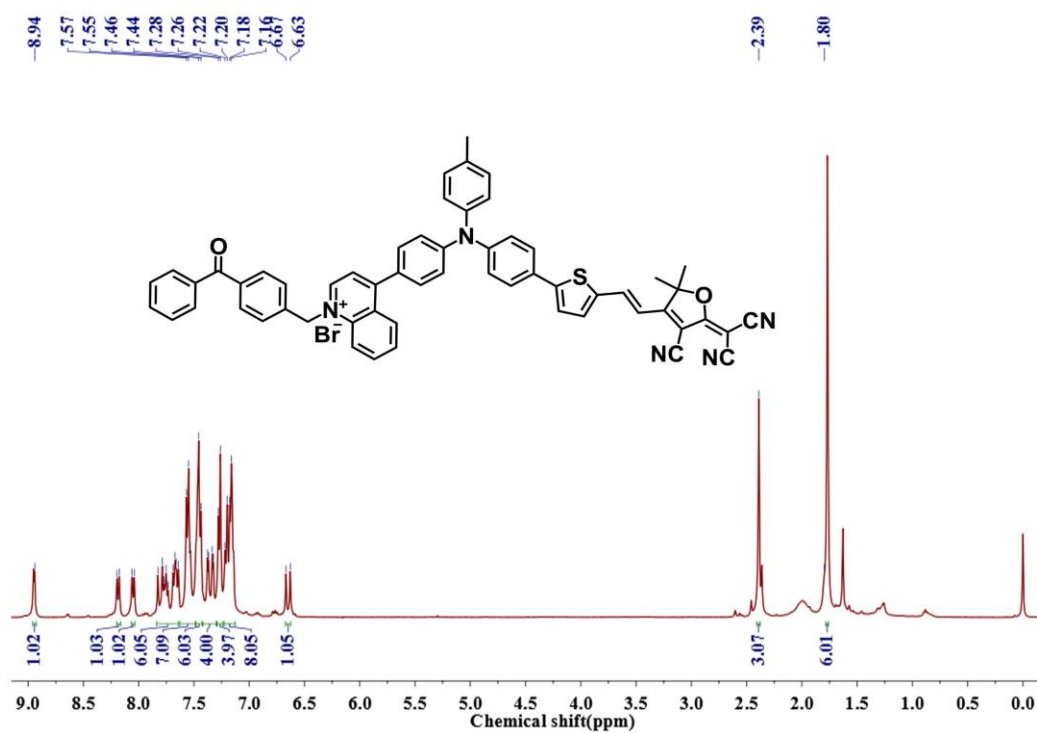

Fig. S14  $^1H$  NMR spectrum of FCN-TPAQ-BP in  $CDCl_3$

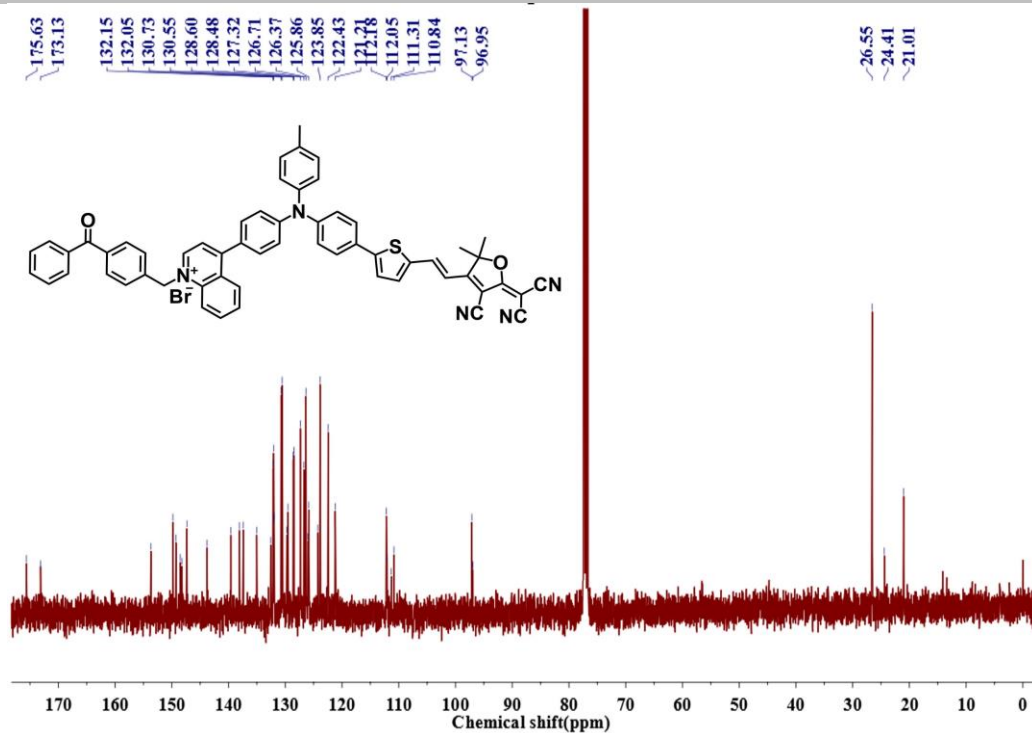

Fig. S15  $^{13}\text{C}$  NMR spectrum of FCN-TPAQ-BP in  $\text{CDCl}_3$ .

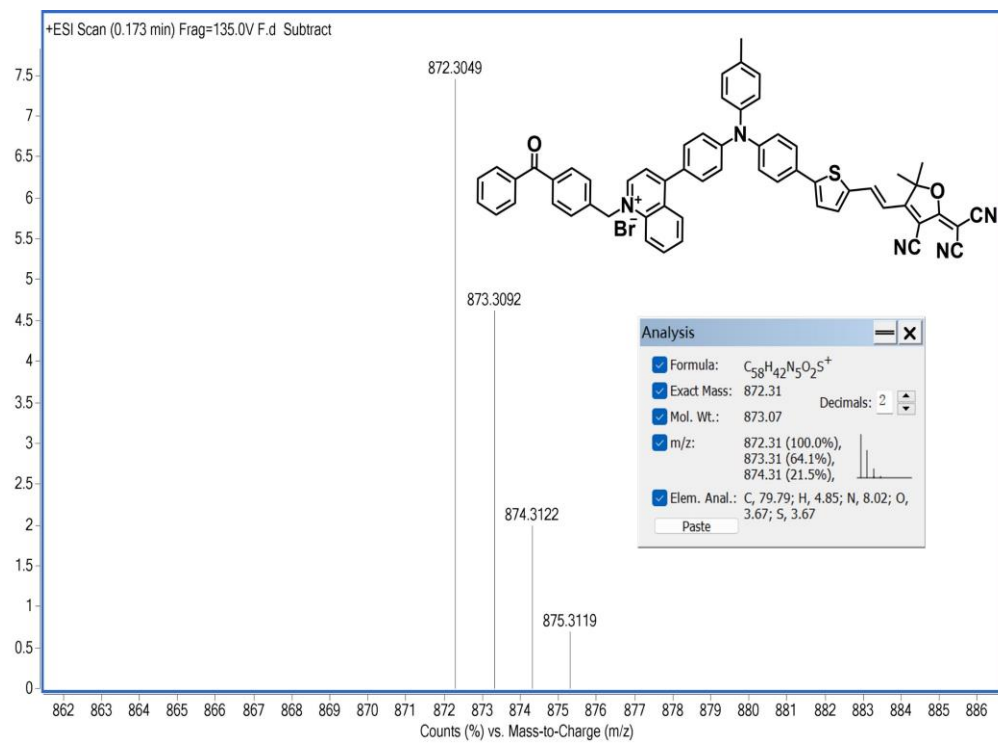

Fig. S16 ESI-MS spectrum of FCN-TPAQ-BP.

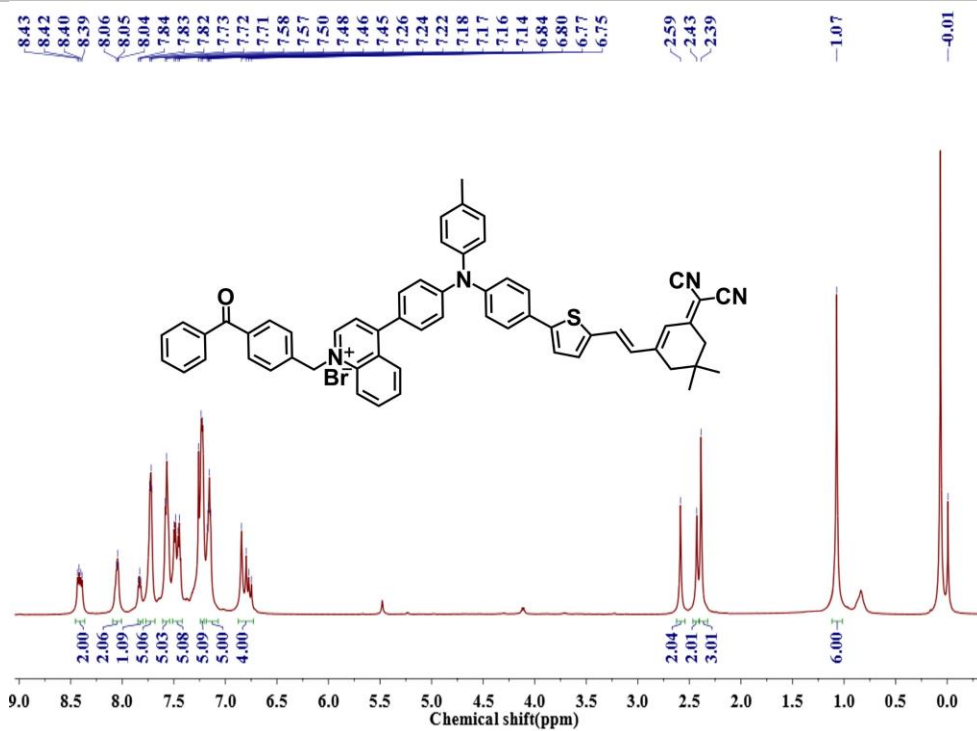

Fig. S17 <sup>1</sup>H NMR spectrum of ACN-TPAQ-BP in CDCl<sub>3</sub>.

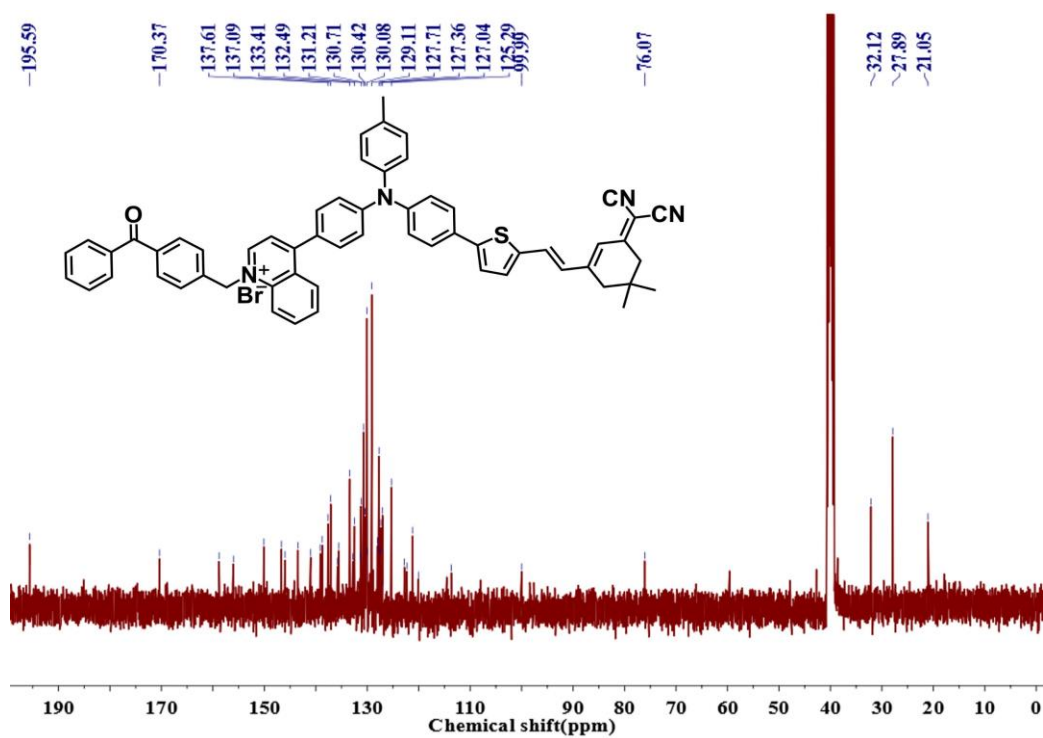

Fig. S18 <sup>13</sup>C NMR spectrum of ACN-TPAQ-BP in DMSO-*d*<sub>6</sub>.

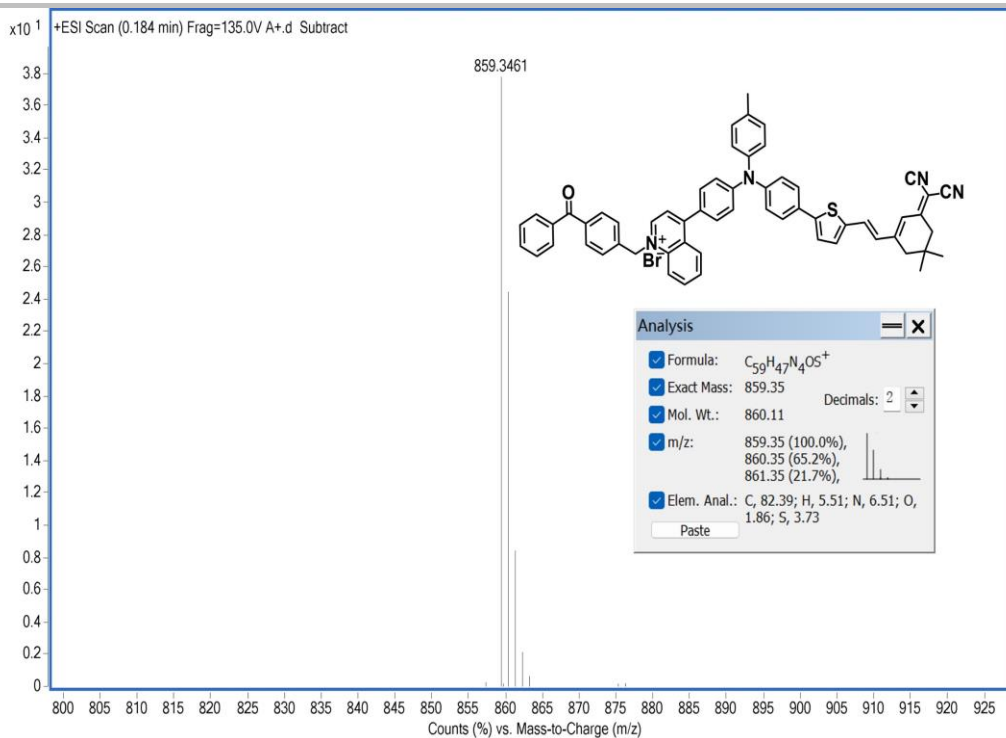

**Fig. S19** ESI-MS spectrum of ACN-TPAQ-BP.

### 3 Results and Discussion

#### 3.1 Photophysical Properties

**Table S1.** Calculated energy of the singlet (S) and triplet (T) excited states

| Compounds      | CN-TPAQ-BP | ICN-TPAQ-BP | FCN-TPAQ-BP | ACN-TPAQ-BP |
|----------------|------------|-------------|-------------|-------------|
| S <sub>1</sub> | 2.6030     | 2.6318      | 2.5962      | 2.5189      |
| S <sub>2</sub> | 3.5918     | 3.1041      | 3.1506      | 3.0053      |
| S <sub>3</sub> | 3.6477     | 3.5519      | 3.3335      | 3.2529      |
| T <sub>1</sub> | 1.7949     | 1.7048      | 1.3726      | 1.3023      |
| T <sub>2</sub> | 1.9217     | 1.9405      | 1.9202      | 1.8553      |
| T <sub>3</sub> | 2.8313     | 2.3326      | 2.4052      | 2.3979      |
| T <sub>4</sub> | 3.0127     | 2.8672      | 2.8189      | 2.7856      |
| T <sub>5</sub> | 3.0754     | 3.0049      | 3.0125      | 2.9626      |
| T <sub>6</sub> | 3.3421     | 3.0113      | 3.0299      | 3.0098      |
| T <sub>7</sub> | 3.4155     | 3.1686      | 3.2828      | 3.1731      |

**Table S2.** Photophysical properties of the compounds

| Compounds   | $\lambda_{\text{abs}}$ (nm) | $\lambda_{\text{em}}$ (nm) | $\epsilon$ (M <sup>-1</sup> cm <sup>-1</sup> ) | $\tau$ (ns) |          | ROS yield (RB=1) | $\Delta E_{\text{L-H}}$ (eV) | SOC constant (S <sub>1</sub> -T <sub>1</sub> ) |
|-------------|-----------------------------|----------------------------|------------------------------------------------|-------------|----------|------------------|------------------------------|------------------------------------------------|
|             |                             |                            |                                                | $\tau_1$    | $\tau_2$ |                  |                              |                                                |
| CN-TPAQ-BP  | 496                         | 806                        | 18600                                          | 2.01        | 13.41    | 3.208            | 3.921                        | 0.5630                                         |
| ICN-TPAQ-BP | 491                         | 822                        | 10400                                          | 1.87        | 14.32    | 3.493            | 4.128                        | 0.450                                          |
| FCN-TPAQ-BP | 500                         | 873                        | 14800                                          | 2.10        | 13.49    | 4.760            | 3.928                        | 0.6795                                         |
| ACN-TPAQ-BP | 500                         | 815                        | 21800                                          | 2.00        | 14.32    | 4.480            | 3.934                        | 0.6363                                         |

#### 3.2 AIE properties

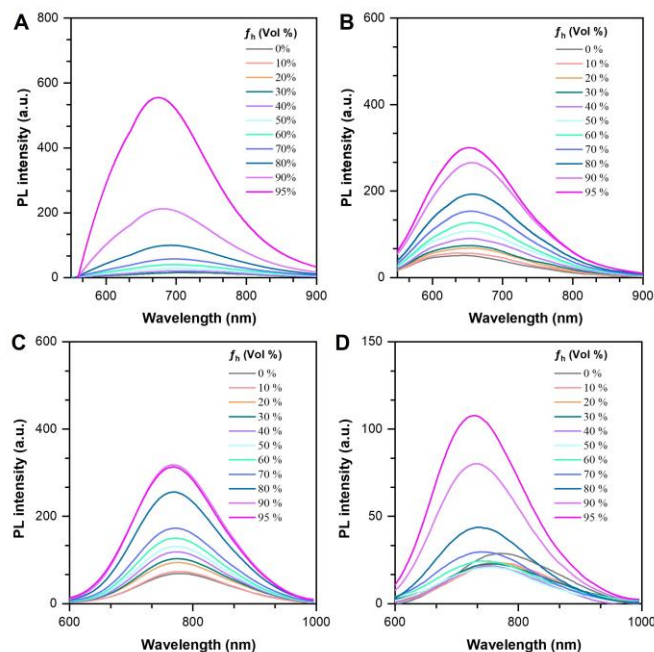

**Fig. S20** PL spectra of (A) CN-TPAQ-BP, (B) ICN-TPAQ-BP, (C) FCN-TPAQ-BP, (D) ACN-TPAQ-BP, in acetonitrile/diethyl ether mixture with different diethyl ether fractions (0-95%).

#### 3.3 Photostability and solvation effect

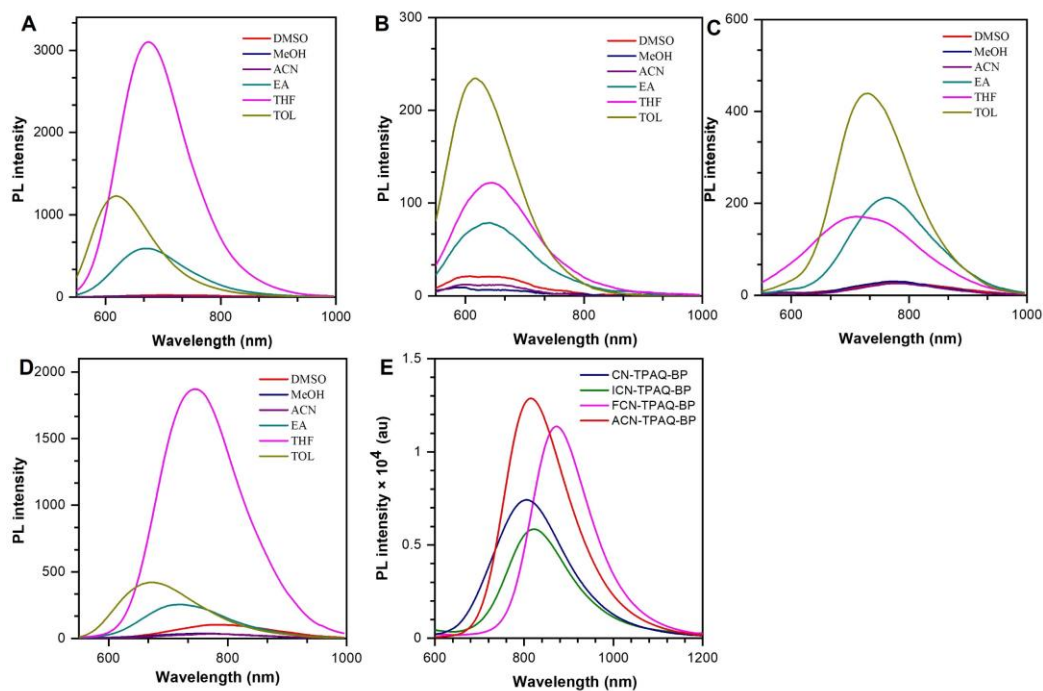

**Fig. S21** PL spectra of (A) CN-TPAQ-BP, (B) ICN-TPAQ-BP, (C) FCN-TPAQ-BP, (D) ACN-TPAQ-BP in different solvents (10  $\mu$ M). (E) PL spectra of compounds in the solid state.

### 3.4 ROS generation

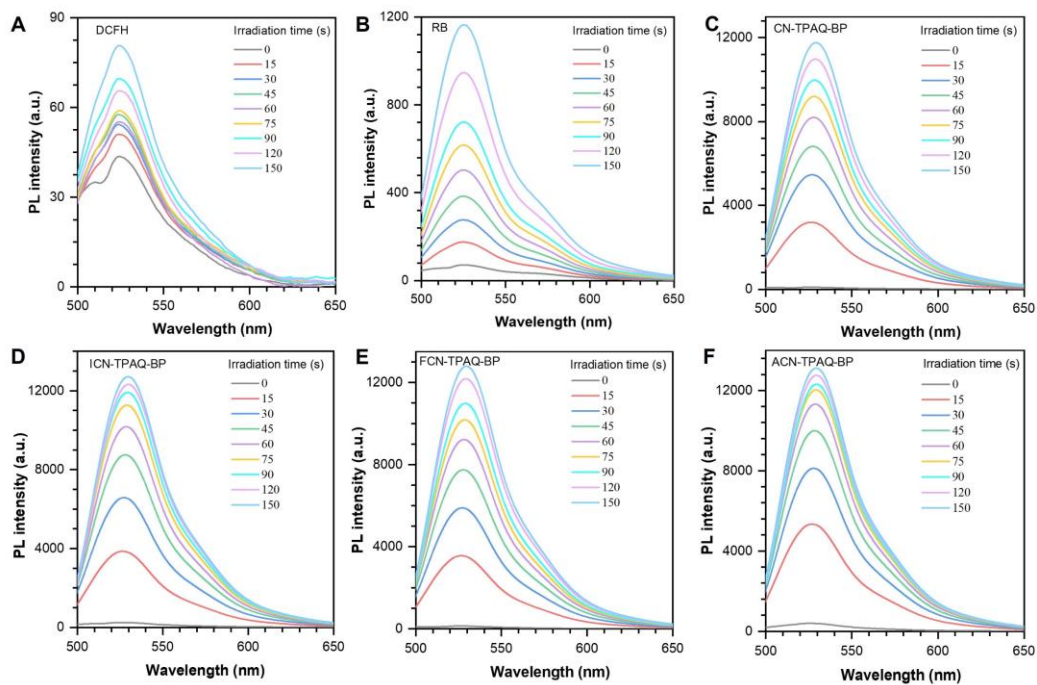

**Fig. S22** ROS generation of (A) DCFH, (B) RB, (C) CN-TPAQ-BP, (D) ICN-TPAQ-BP, (E) FCN-TPAQ-BP, and (F) ACN-TPAQ-BP (1  $\mu$ M) upon exposure to white light using DCFH (10  $\mu$ M) as an indicator.

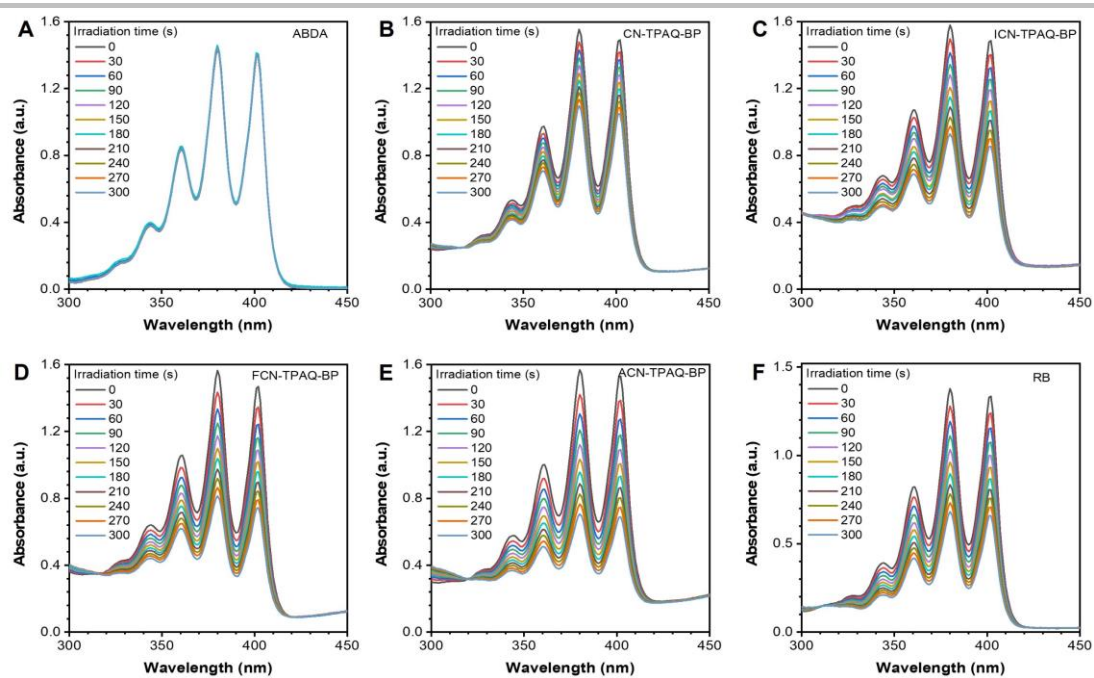

**Fig. S23** Absorption of ABDA (50  $\mu\text{M}$ ,  $^1\text{O}_2$  probe) in water in the absence (blank, A) and presence of (B) CN-TPAQ-BP, (C) ICN-TPAQ-BP, (D) FCN-TPAQ-BP, (E) ACN-TPAQ-BP and (F) RB (10  $\mu\text{M}$ ) under white light irradiation for different time.

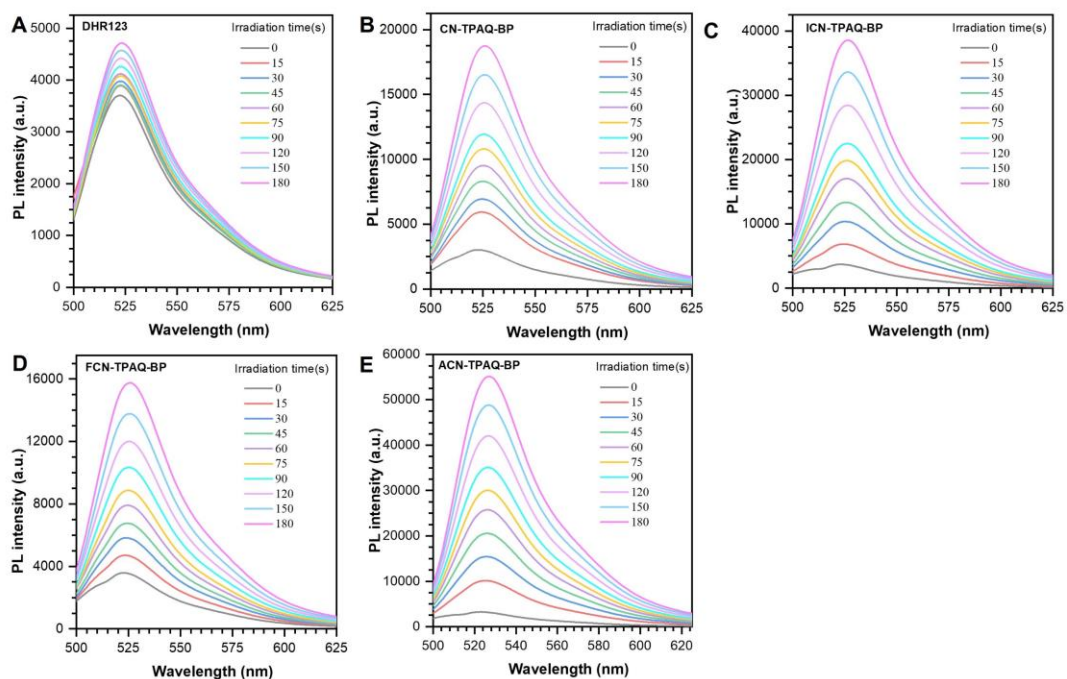

**Fig. S24** PL spectra of DHR 123 (5  $\mu\text{M}$ ) in PBS in the presence of (A) blank, (B) CN-TPAQ-BP, (C) ICN-TPAQ-BP, (D) FCN-TPAQ-BP and (E) ACN-TPAQ-BP (1  $\mu\text{M}$ ) after exposure to white light irradiation (10  $\text{mW cm}^{-2}$ ) with different time.

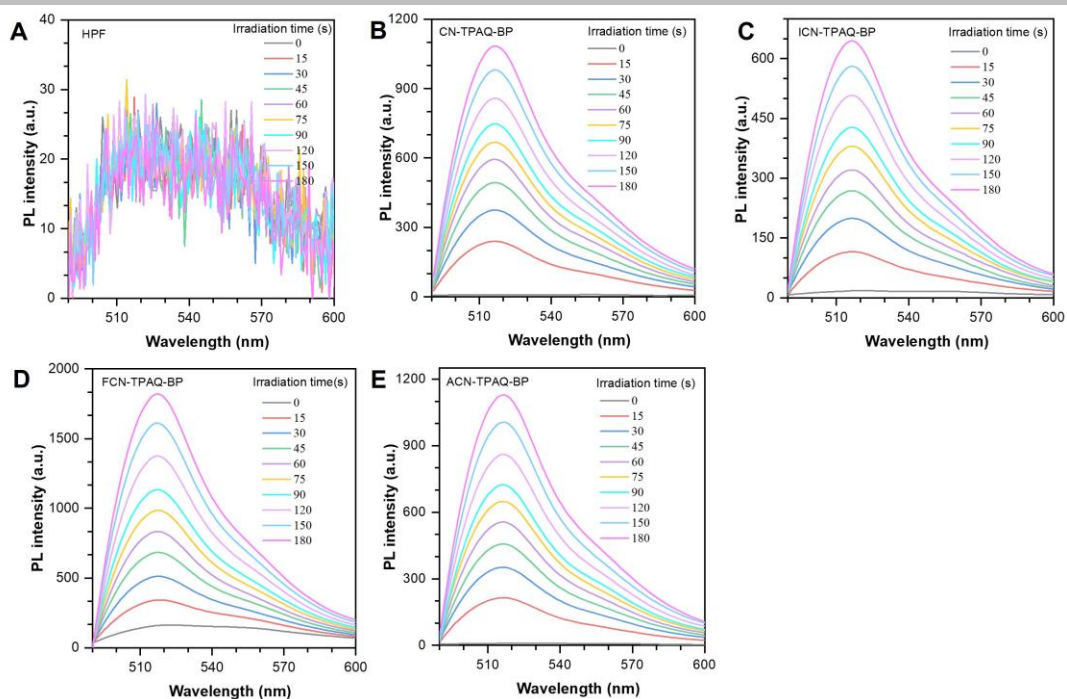

**Fig. S25** PL spectra of HPF (5  $\mu\text{M}$ ,  $\bullet\text{OH}$  probe) in the absence (blank, A) and presence of (B) CN-TPAQ-BP, (C) ICN-TPAQ-BP, (D) FCN-TPAQ-BP and (E) ACN-TPAQ-BP (1  $\mu\text{M}$ ) in PBS upon white light irradiation with 10  $\text{mW cm}^{-2}$  for different time.

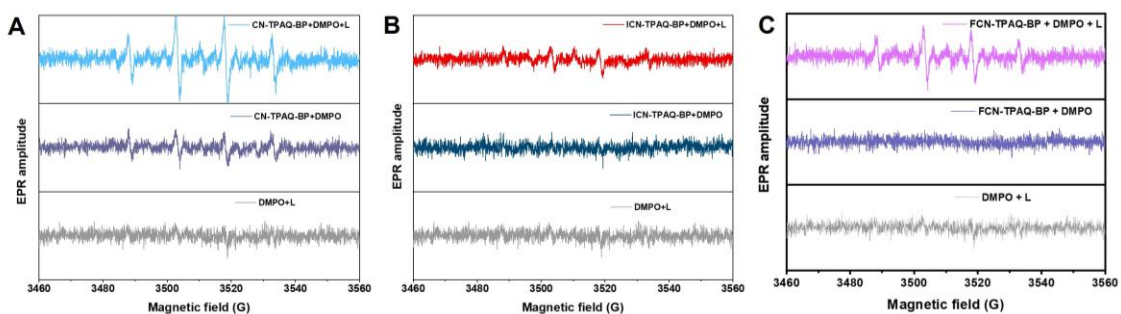

**Fig. S26** EPR signals of DMPO (10  $\mu\text{L}$ ) in the presence (A) CN-TPAQ-BP and (B) ICN-TPAQ-BP (C) FCN-TPAQ-BP in  $\text{H}_2\text{O}$  with/without white light irradiation (10  $\text{mW cm}^{-2}$ ) for 5 min.

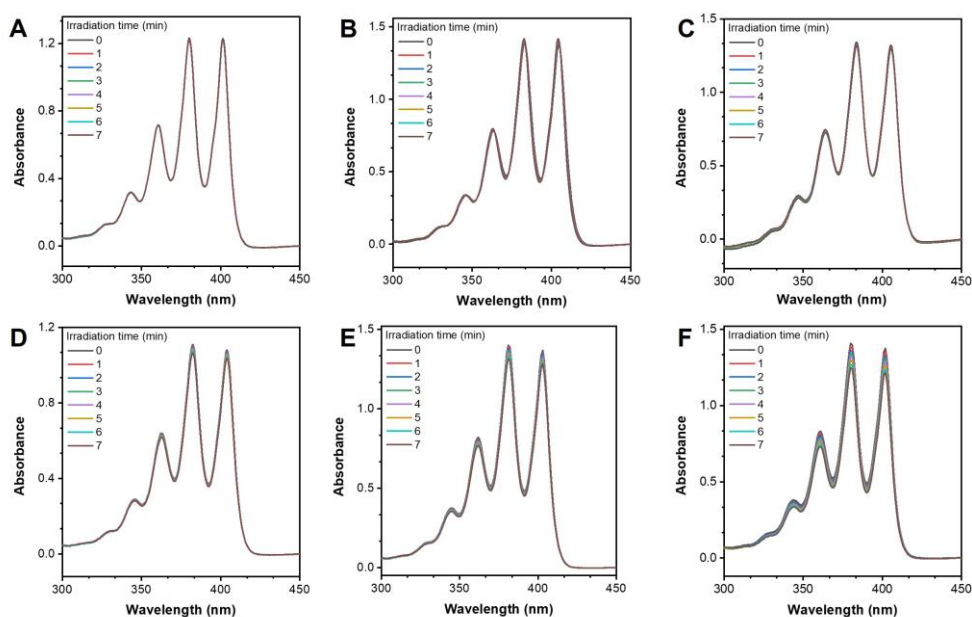



**Fig. S27** (A-F) The absorbance spectra of ABDA (100  $\mu\text{M}$ ,  $^1\text{O}_2$  probe) in the presence of CN-TPAQ-BP (10  $\mu\text{M}$ ) in mixtures of DMSO and PBS with different PBS fractions (0%, 20%, 40%, 60%, 80% and 95%) upon white-light irradiation (10  $\text{mW cm}^{-2}$ ).

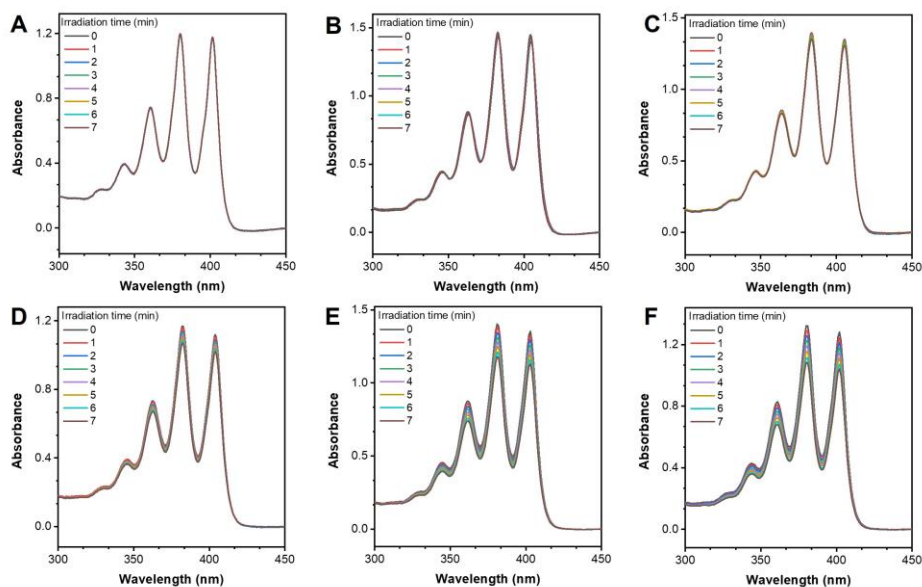

**Fig. S28** (A-F) The absorbance spectra of ABDA (100  $\mu\text{M}$ ,  $^1\text{O}_2$  probe) in the presence of ICN-TPAQ-BP (10  $\mu\text{M}$ ) in mixtures of DMSO and PBS with different PBS fractions (0%, 20%, 40%, 60%, 80% and 95%) upon white-light irradiation (10  $\text{mW cm}^{-2}$ ).

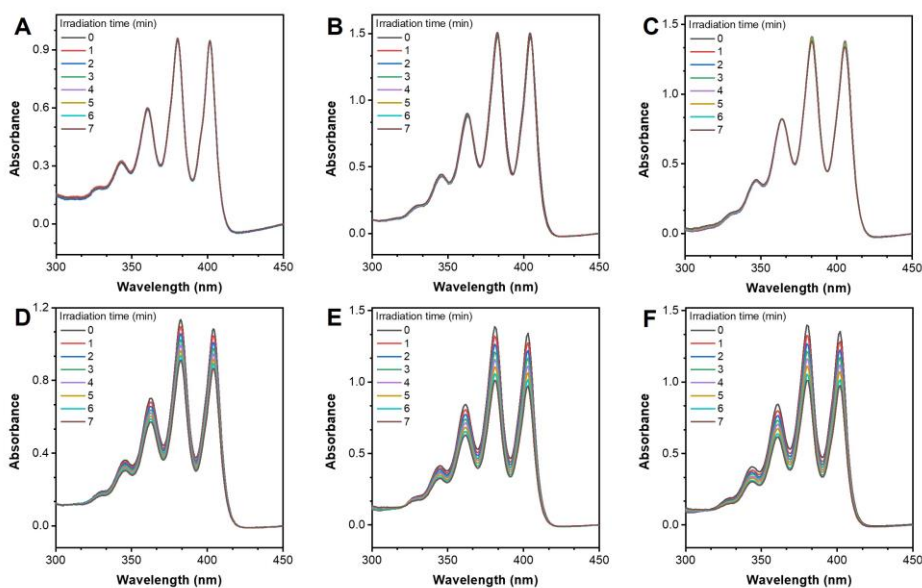

**Fig. S29** (A-F) The absorbance spectra of ABDA (100  $\mu\text{M}$ ,  $^1\text{O}_2$  probe) in the presence of FCN-TPAQ-BP (10  $\mu\text{M}$ ) in mixtures of DMSO and PBS with different PBS fractions (0%, 20%, 40%, 60%, 80% and 95%) upon white-light irradiation (10  $\text{mW cm}^{-2}$ ).

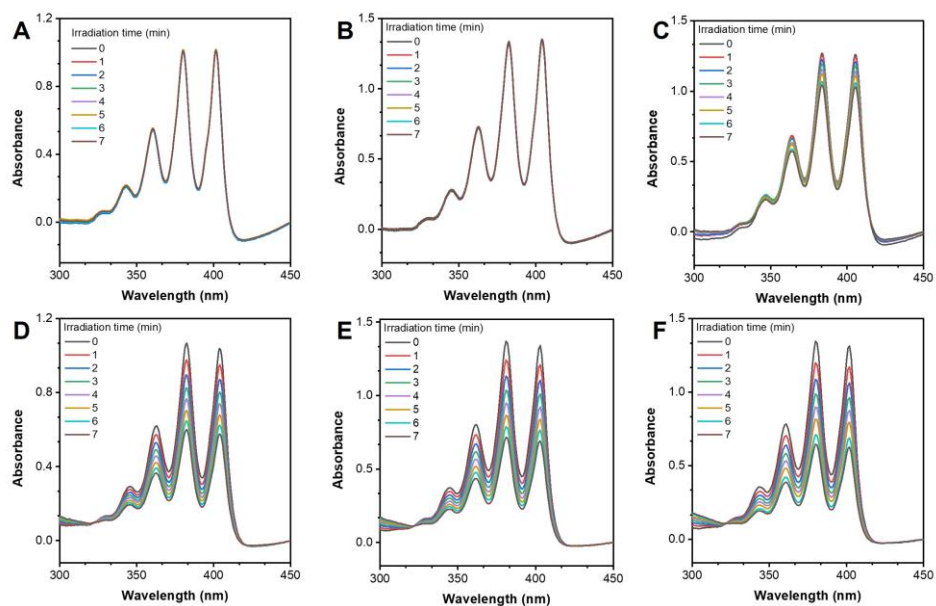

**Fig. S30** (A-F) The absorbance spectra of ABDA (100  $\mu\text{M}$ ,  $^1\text{O}_2$  probe) in the presence of ACN-TPAQ-BP (10  $\mu\text{M}$ ) in mixtures of DMSO and PBS with different PBS fractions (0%, 20%, 40%, 60%, 80% and 95%) upon white-light irradiation (10  $\text{mW cm}^{-2}$ ).

### 3.5 Cell Imaging and cell viability

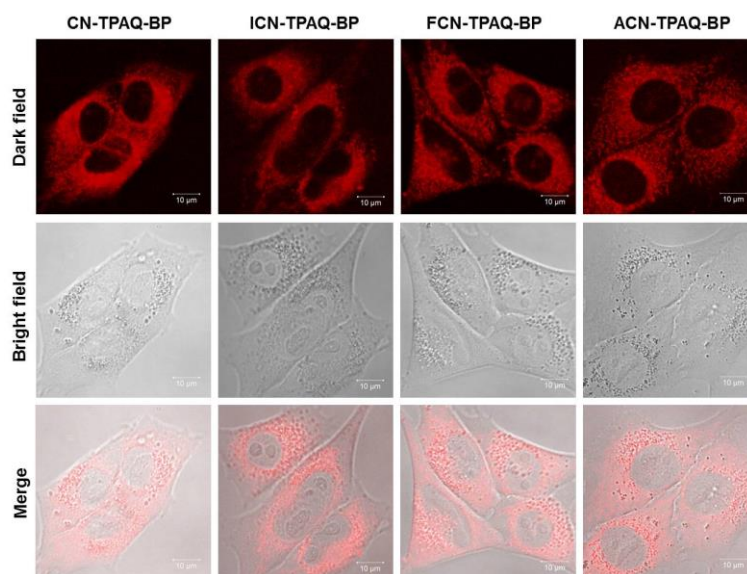

**Fig. S31** Fluorescence images of 4T1 cells stained with 10  $\mu\text{M}$  CN-TPAQ-BP, ICN-TPAQ-BP, FCN-TPAQ-BP and ACN-TPAQ-BP for 6 h, respectively.

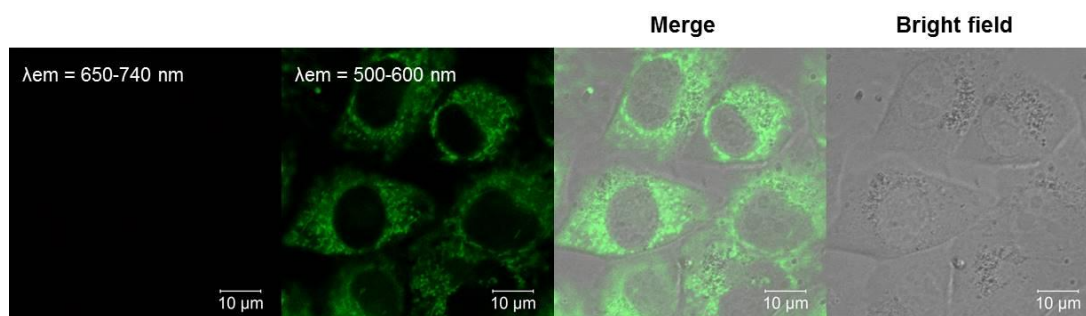

**Fig. S32** CLSM images of 4T1 cells co-stained with MitoTracker Green (conc.: 1  $\mu\text{M}$ ), incubation time: 0.5 h,  $\lambda_{\text{ex}} = 488 \text{ nm}$ ).

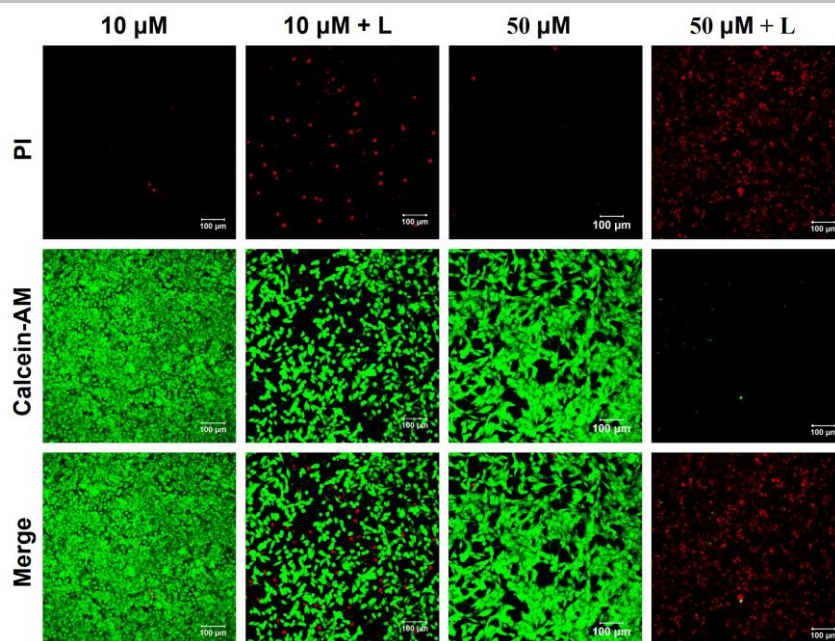

Fig. S33 Live/dead staining assay of 4T1 cells after various treatments of CN-TPAQ-BP.

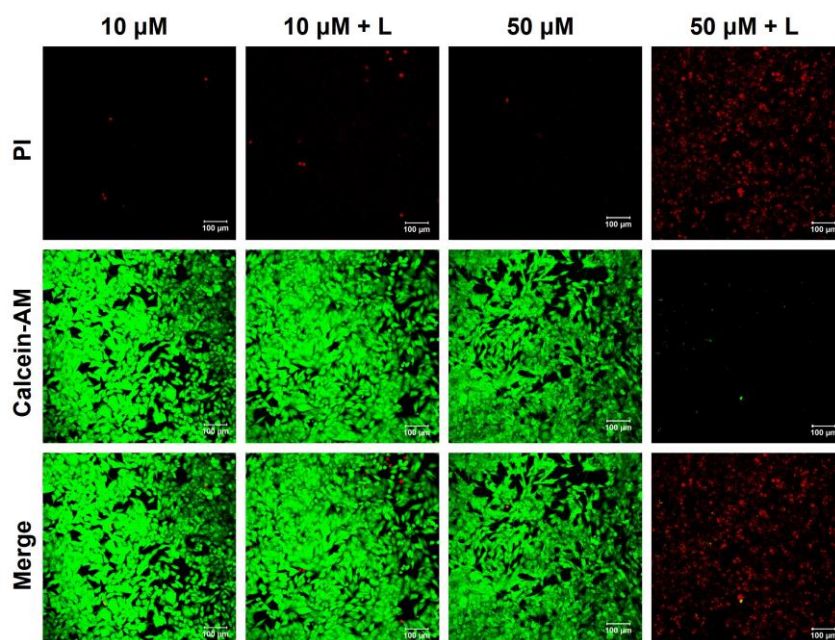

Fig. S34 Live/dead staining assay of 4T1 cells after various treatments of ICN-TPAQ-BP.

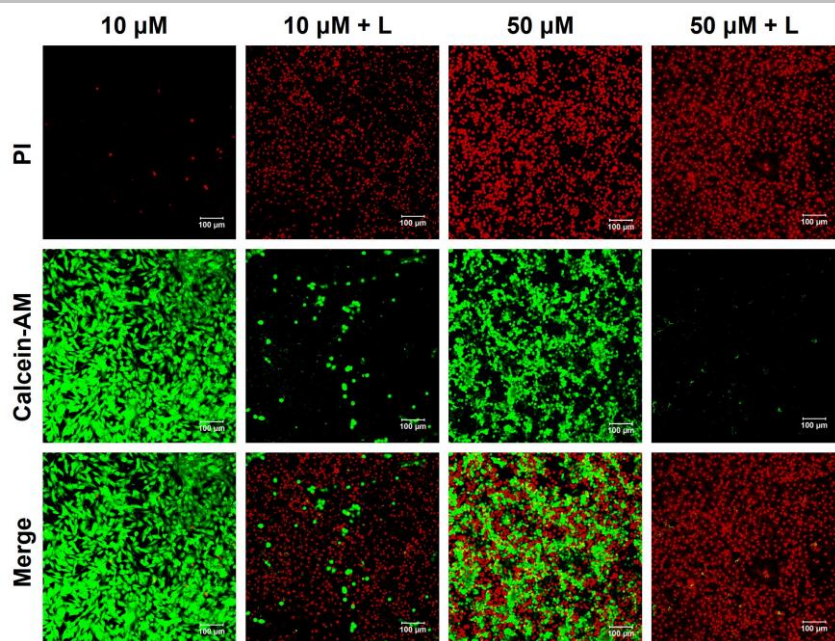

**Fig. S35** Live/dead staining assay of 4T1 cells after various treatments of ACN-TPAQ-BP.

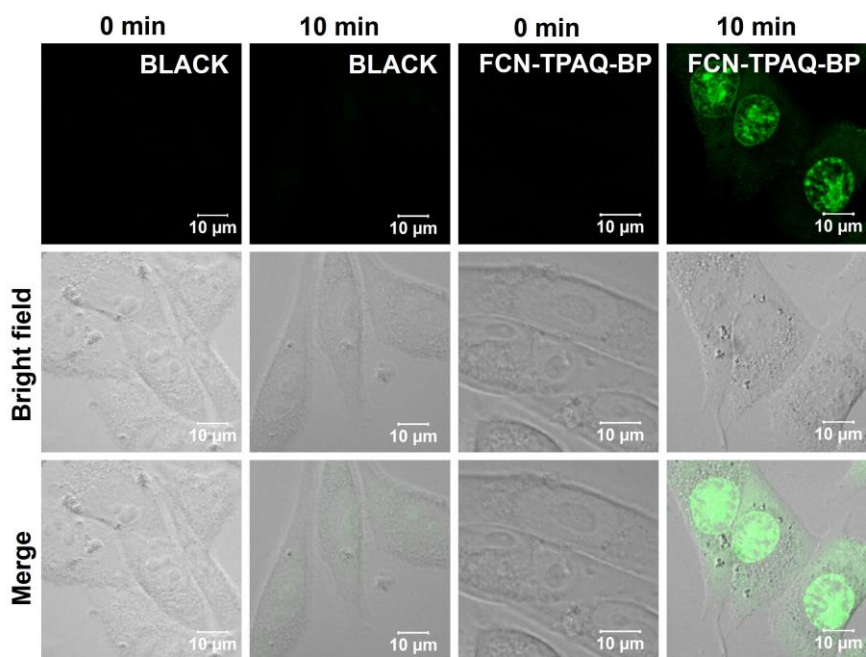

**Fig. S36**  $\text{O}_2^{\cdot -}$  generation of FCN-TPAQ-BP (10  $\mu\text{M}$ ) in 4T1 cells by using DHE (5  $\mu\text{M}$ ) as indicators, before and after exposure to white light (0.4  $\text{mW cm}^{-2}$ ) irradiation.

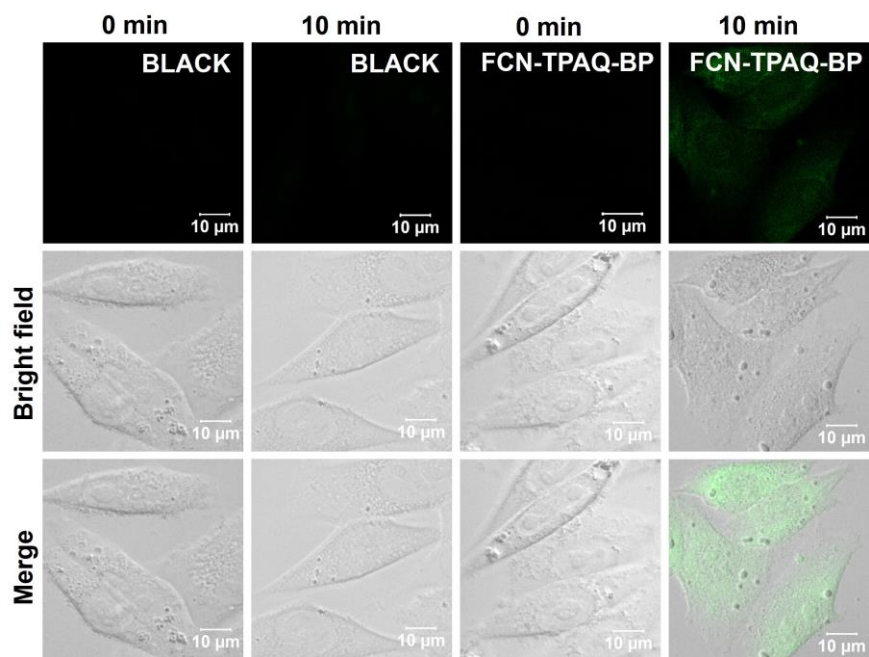

**Fig. S37** •OH generation of FCN-TPAQ-BP (10  $\mu$ M) in 4T1 cells by using HPF (5  $\mu$ M) as indicators, before and after exposure to white light (0.4 mW cm<sup>-2</sup>) irradiation.
